# Supplementary material
Source: PubMed Central journal article supplement (PMC4865919)
Supplement: 10.1074_M116.722298_jbc.M116.722298-1.pdf [file 10.1074_M116.722298_jbc.M116.722298-1.pdf]

## Rab13 Traffics on Vesicles Independent of Prenylation

**Maria S. Ioannou, Martine Girard, & Peter S. McPherson\***

Department of Neurology and Neurosurgery, Montreal Neurological Institute, McGill University, Montreal, Quebec H3A 2B4, Canada

Table S1.

**Oligonucleotides used in the study**

| <b>Primers for fusion proteins</b> |                                                                |
|------------------------------------|----------------------------------------------------------------|
| Rab13 aa 1 EcoRI F                 | GCGGAATTCATGGCCAAAGCCTACGACCAC                                 |
| Rab13 aa 199 BamHI R               | GCGGGATCCTCACTTGTTGGTGTCTTCTTGTCAC                             |
| Rab13 aa 175 BamHI R               | GCGGGATCCTCAGCCTCCTGACTTGAGCAAGATG                             |
| <b>Sequences for shRNAs</b>        |                                                                |
| Rab13 shRNA #1                     | GTACCGGAGAGCGGTTCAAGACAATAACCTCGAGGTTATTGTCTTGAACCGCTCTTTTTTTG |
| Rab13 shRNA #2                     | GTACCGGAGAAGGAGCAGGCCGATAAGTCTCGAGACTTATCGGCCTGCTCCTTCTTTTTTTG |
| Rab13 shRNA #3                     | CCGGATGAGAAATCTTTCGAGAATACTCGAGTATTCTCGAAAGATTCTCATTTTTTG      |
