# Supplementary material
Source: PubMed Central journal article supplement (PMC4865919)
Supplement: 10.1074_M116.722298_jbc.M116.722298-4.pdf [file 10.1074_M116.722298_jbc.M116.722298-4.pdf]

Rab13 Traffics on Vesicles Independent of Prenylation

**Maria S. Ioannou, Martine Girard, & Peter S. McPherson\***

Department of Neurology and Neurosurgery, Montreal Neurological Institute, McGill University,  
Montreal, Quebec H3A 2B4, Canada

**Supplemental movie legends**

**Supplemental movie 1:** MCF10A cells expressing mCh-Rab13-T22N- $\Delta$ C were imaged live every 2 seconds. Time is displayed in min:sec. This movie corresponds with Fig, 4 B.

**Supplemental movie 2:** MCF10A cells expressing mCh-Rab13-T22N- $\Delta$ HVD were imaged live every 2 seconds. Time is displayed in min:sec. This movie corresponds with Fig, 4 B
